# Supplementary material for: Mixotrophy emerges as the optimal strategy in mature waters of the Amazon River plume
Source: Research Square preprint supplement (doi:10.21203/rs.3.rs-4742841/v1), 2025-02-17
Supplement: Supplementary file 1 [file 8c2842a3479a2b0c2fdcff65.xlsx]

## Sheet: parameters
Name of the parameter	Units	Method/Device	Comment
Cruise
Year
Event
Station
Date	dd/mm/yyyy
Latitude	degree N
Longitude	degree E
Habitat			Full delineation in Pham et al (2024), doi: 10.3389/fmars.2024.1287497
Sampling Depth	m
Sea Surface Temperature	degree C	CTD, Sea-Bird, SBE 911plus
Sea Surface Salinity	PSU	CTD, Sea-Bird, SBE 911plus
Mixed Layer Depth	m	Estimated as the depth of the primary maximum of buoyancy frequency in the upper water column
Maximum Buoyancy Frequency	s-2	Calculated in R package oce using the UNESCO-style swSigmaTheta function
Plume Thickness	m	Estimated as the depth where salinity reached 35
Surface Oxygen concentration	µM	CTD, Sea-Bird, SBE 911plus
Surface Oxygen Saturation Concentration	µM	Theoretical saturation concentration according to Benson and Krause (1984), doi: 10.4319/lo.1984.29.3.0620
Surface Oxygen saturation	%	Measured Oxygen concentration / Theoretical saturation concentration
Surface Chlorophyll a concentration	µgL-1	High-performance Liquid Chromatography, Agilent RR1200
Surface Nitrate Concentration	µM	Methods of Seawater Analysis, Third Edition (Grasshoff et al., 1999)
Surface Ammonimum Concentration	µM	Methods of Seawater Analysis, Third Edition (Grasshoff et al., 1999)
Surface Phosphate Concentration	µM	Methods of Seawater Analysis, Third Edition (Grasshoff et al., 1999)
Surface Silicate Concentration	µM	Methods of Seawater Analysis, Third Edition (Grasshoff et al., 1999)
Surface Si:N ratio
Trophic Position		Dichotomic variable after numeric calculations. Autotroph TP< 1.4, Mixotroph 1.4<=TP<=1.6
Trophic Position (numeric)	>0.2 µm (2018)	Calculated according to Chikaraishi et al (2009), doi: 10.4319/lom.2009.7.740	Samples collected on 0.2µm nucleopore filter. Total seston unfractionated.
Trophic Position (numeric)	0.2-3.0 µm (2021)	Calculated according to Chikaraishi et al (2009), doi: 10.4319/lom.2009.7.740	Samples collected on 0.2µm nucleopore filter. Seston between 0.2 and 3µm
Trophic Position (numeric)	3-200 µm (2021)	Calculated according to Chikaraishi et al (2009), doi: 10.4319/lom.2009.7.740	Samples collected on 3µm nucleopore filter. Seston above 3µm

## Sheet: data
Cruise	Year	Event	Station	Date	Latitude	Longitude	Habitat	Sampling Depth	Sea Surface Temperature	Sea Surface Salinity	Mixed Layer Depth	Maximum Buoyancy Frequency	Plume Thickness	Surface Oxygen concentration	Surface Oxygen Saturation Concentration	Surface Oxygen saturation	Surface Chlorophyll a concentration	Surface Nitrate Concentration	Surface Ammonimum Concentration	Surface Phosphate Concentration	Surface Silicate Concentration	Surface Si:N ratio	Trophic Position	Trophic Position (numeric)	Trophic Position (numeric)	Trophic Position (numeric)
				dd/mm/yyyy	degree N	degree E		m	degree C	PSU	m	s-2	m	µM	µM	%	µgL-1	µM	µM	µM	µM			>0.2 µm (2018)	0.2-3.0 µm (2021)	3-200 µm (2021)
EN614	2018	3.09	003	2018-05-08	8.57589	-54.5183	OPM	10.486	27.7035	33.5722	30	0.00777703	29.9956	205.151	204.596	100.271	0.226	0		0.052	5.343		Autotroph	1.09467
EN614	2018	6.04	006	2018-05-11	7.33056	-55.5974	OPM	7.848	27.0488	32.3023	21	0.00590446	22.9961	213.054	208.246	102.309	0.477	0		0.245	6.943		Mixotroph	1.64625
EN614	2018	8.02	008	2018-05-12	7.36501	-53.8181	YPC	5.25443	27.1891	30.2031	13	0.00690957	20.997	219.088	210.625	104.018	0.42						Autotroph	1.25099
EN614	2018	10.04	010	2018-05-13	7.34689	-50.8927	OSW	4.6185	27.8707	35.8771	82	0.000943818	0	198.523	200.965	98.7847	0.175	0.845		0	1.09	1.28994	Autotroph	1.32961
EN614	2018	12.01	012	2018-05-14	4.8895	-51.7127	YPC	3.10067	27.2721	15.8812	6	0.0450822	8.9992	257.377	230.316	111.749	5.118	2.064		0.091	58.518	28.3517	Autotroph	1.0652
EN614	2018	17.01	017	2018-05-18	5.09631	-51.5082	YPC	3.2285	27.556	22.8588	10	0.0285435	8.9992	211.235	219.327	96.3105	1.988	2.243		1.936	32.783	14.6157	Autotroph	0.697368
EN614	2018	22.04	022	2018-05-20	9.97504	-56.2677	OPM	5.423	27.4723	34.0121	37	0.00372035	33.9968	200.821	204.659	98.1245	0.207	0		0.039	2.1		Mixotroph	1.58984
EN614	2018	24.03	024	2018-05-21	10.5793	-57.253	OPM	5.186	27.3208	28.9947	13	0.0059363	23.9982	207.019	211.785	97.7495		0.122		0.001	6.672	54.6885	Mixotroph	1.41138
EN614	2018	25.03	025	2018-05-24	13.0259	-55.9052	OPM	2.8184	27.342	32.5714	35	0.0080686	33.0008	200.778	206.971	97.0077	0.174	0.23		0	5.355	23.2826	Mixotroph	1.40123
EN614	2018	27.03	027	2018-05-25	13.0042	-53.8378	OSW	4.286	26.6337	36.2775	122	0.00154969	0	200.167	204.506	97.8784	0.132	0.024		0	0.756	31.5	Autotroph	1.10088
EN614	2018	31.11	031	2018-05-27	14.6494	-55.2891	OPM	2.89875	27.3018	31.1252	23	0.00793469	30.0025	202.9	209.012	97.0757	0.191	0		0.153	9.166		Mixotroph	1.39921
EN614	2018	33.02	033	2018-05-29	16.2892	-56.7822	OPM	3.567	27.3388	31.8857	19	0.0042692	25.0042	201.329	207.883	96.8475	0.108	0		0.226	4.219		Autotroph	1.1739
M174	2021	7.04	A43	2021-04-21	2.5544	-44.8117	OSW	0.5	28.036	36.0242	114.959	0.00153824	0	198.342	200.204	99.0698	0.148	0.166		0.051	1.1025	6.64157	Autotroph		1	0.8
M174	2021	8.07	A42	2021-04-21	1.64718	-45.8546	OSW	0.5	28.3309	36.2077	84.06	0.00129426	0	198.269	199.024	99.621	0.148	0.4135	0.545	0.095	1.063	2.57074	Autotroph		1.2	1.1
M174	2021	9.07	A48	2021-04-23	-0.1217	-47.7311	RI	0.5	27.5056	3.7486	9.524	0.070669	30.5483	226.959	247.46	91.7156	1.28	10.735	0.973865	0.541	127.285	11.857	Autotroph		1.2	0.9
M174	2021	10.08	A38	2021-04-23	-0.59755	-48.2605	RI	0.5	28.9757	0.8935	10.4365	0.0125189	12.5372	206.28	245.012	84.1918	0.891	11.251	0.523	0.372	142.62	12.6762	Autotroph		1.2	1.1
M174	2021	12.02	A36	2021-04-24	0.59683	-48.3738	RI	1.27513	28.1069	0.4681	6.465	0.171028	12.6754	224.179	249.365	89.8996	0.415	10.116	1.2165	0.7565	167.23	16.5312	Autotroph		1.1	0.9
M174	2021	14.04	A32	2021-04-25	1.61258	-48.8396	RI	1.11075	28.6077	4.6208	7.4715	0.0551812	13.7868	237.827	241.55	98.4588	3.323	13.0515	0.3225	0.305	148.97	11.414	Autotroph		1.3	1
M174	2021	17.17	A29D	2021-04-27	1.4276	-48.4434	RI	0.5	29.229	4.0362	7.4105	0.13256	10.7936	224.584	239.736	93.6797	0.849	9.8665	0.4495	0.2675	142.51	14.4438	Autotroph/Mixotroph		0.9	1.5
M174	2021	19.06	A20	2021-04-29	3.41225	-49.9665	YPC	0.5	29.1154	19.1196	11.3955	0.0229849	14.9121	214.855	218.775	98.2079	11.184	0.104	0.2565	0.125	46.2555	444.764	Autotroph		1.3	0.8
M174	2021	20.05	SF3	2021-04-30	4.4058	-49.1215	OSW	0.5	27.6472	36.1923	89.9955	0.00133322	0	197.677	201.243	98.2279	0.179	1.4445	0.298	0.131	1.2195	0.844237	Autotroph		1.3	1.2
M174	2021	21.07	A19D	2021-05-01	3.55288	-49.9033	WPM	0.5	28.1482	34.8153	5.3625	0.00249351	4.15396	196.506	201.967	97.2962	1.052	1.568	0.0205	0.1665	27.7865	17.721	Mixotroph		1.4	1.5
M174	2021	24.01	A10	2021-05-04	5.4538	-52.5579	YPC	1.91414	27.5064	29.417	12.4705	0.0255635	13.8484	192.446	210.529	91.4106	2.144	0.516	0.702	0.2485	8.3455	16.1734	Mixotroph		1.4	1.6
M174	2021	25.05	A09	2021-05-05	6.29328	-51.6769	OSW	0.5	27.873	36.1625	78	0.00192682	0	196.005	200.553	97.7323	0.083	0.1125	0	0.0405	0.8475	7.53333	Autotroph		0.8	0.8
M174	2021	26.1	A09D	2021-05-05	6.06373	-52.0802	WPM	0.5	28.4354	33.9664	8.505	0.00384357	8.86301	195.377	201.571	96.9274	0.171	0.316	0	0.0915	5.729	18.1297	Autotroph		1.3	1.1
M174	2021	28.02	A46	2021-05-07	9.29817	-53.7164	OSW	0.5	27.8834	31.9333	90	0.0114808	19.887	197.363	205.941	95.8349	0.522	0.065	0.0425	0.0605	7.3745	113.454	Autotroph		0.9	1.2
M174	2021	30.12	A63D	2021-05-09	14.2419	-56.6393	OPM	0.5	27.2299	31.1931	19.3165	0.0213168	21.8977	206.788	209.124	98.883	0.354	0.078	0.277	0.0265	6.9535	89.1474	Autotroph		1.2	1.3
M174	2021	31.11	DDA	2021-05-11	14.8081	-56.1134	MOW	0.5	26.5109	33.6146	17.385	0.00688154	18.9342	204.288	208.37	98.0412	0.175	0	0.0445	0.016	3.375		Autotroph		1.2	0.9
M174	2021	32.06	A70	2021-05-13	15.0804	-54.8238	MOW	0.5	26.9224	34.482	26.2215	0.00675873	32.8447	204.29	205.834	99.2497	0.192	0.2205	0.1745	0.031	1.637	7.42404	Autotroph		1.1	1.1
